# Supplementary material for: Development of a panchromatic photosensitizer and its application to photocatalytic CO2 reduction
Source: Royal Society of Chemistry journal article supplement (doi:10.1039/d1sc04045f), 2021-01-01
Supplement: d1sc04045f1.pdf [file d1sc04045f1.pdf]

*Electronic Supplementary Information*

Development of a panchromatic photosensitizer  
and its application to photocatalytic CO<sub>2</sub> reduction

Mari Irikura; Yusuke Tamaki\*; Osamu Ishitani\*

Department of Chemistry, School of Science, Tokyo Institute of Technology, O-okayama 2-12-1-NE-1, Meguro-ku,  
Tokyo, 152-8550, Japan.

Table S1. DFT-calculated characteristics of frontier molecular orbitals of **Os** in ground state.

|        | $E / \text{eV}$ | contributes |    |      |
|--------|-----------------|-------------|----|------|
|        |                 | mbip        | Os | mtpy |
| LUMO+3 | -2.62           | 52          | 4  | 43   |
| LUMO+2 | -2.70           | 46          | 0  | 54   |
| LUMO+1 | -2.79           | 0           | 11 | 89   |
| LUMO   | -2.83           | 87          | 11 | 2    |
| HOMO   | -5.71           | 28          | 57 | 15   |
| HOMO-1 | -6.05           | 11          | 63 | 26   |
| HOMO-2 | -6.08           | 29          | 61 | 10   |

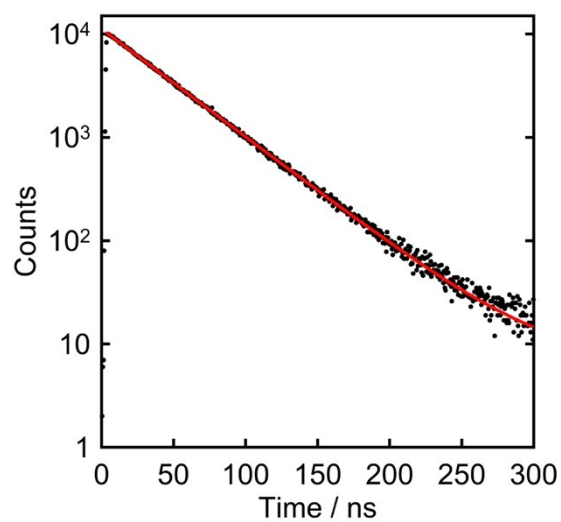

Figure S1. Single-photon counting plots of transient emission at 795 nm from DMA solution of **Os** (●) and its single-exponential fitting (red line). LED pulse (456 nm; pulse duration: 1.3 ns) was used for the excitation light source.

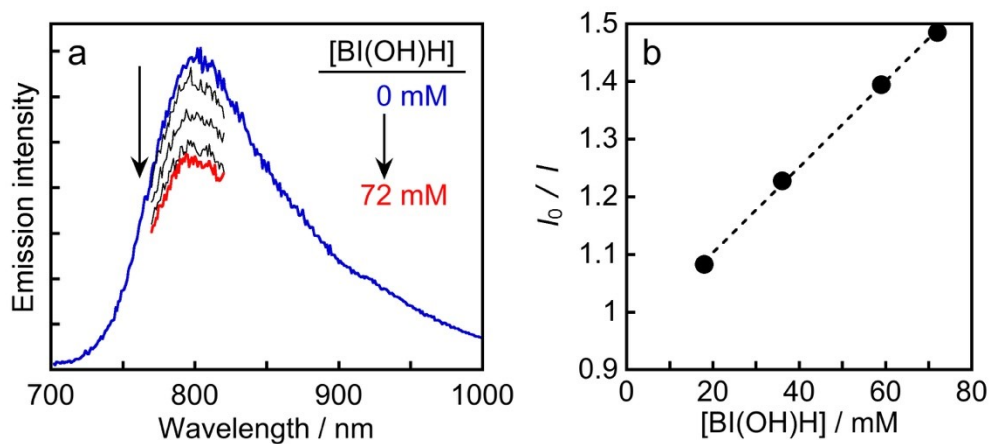

Figure S2. (a) Emission spectra of CO<sub>2</sub>-saturated DMA solutions containing **Os** and BI(OH)H at five different concentrations. (b) Stern-Volmer plot of emission intensity from **Os** against BI(OH)H concentration. Excitation wavelength was 550 nm.

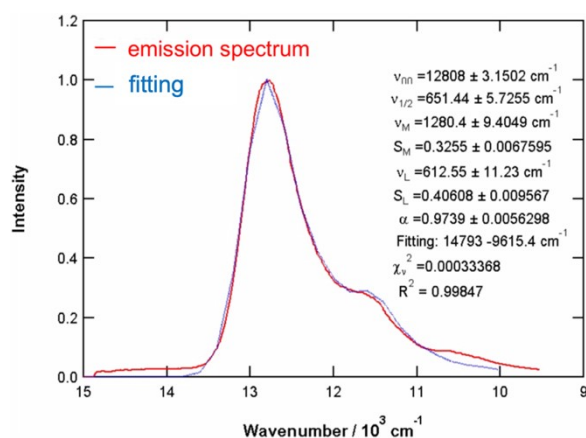

Figure S3. Emission spectrum of **Os** measured in frozen DMA by liquid nitrogen (red line) and its Franck-Condon fitting (blue line).

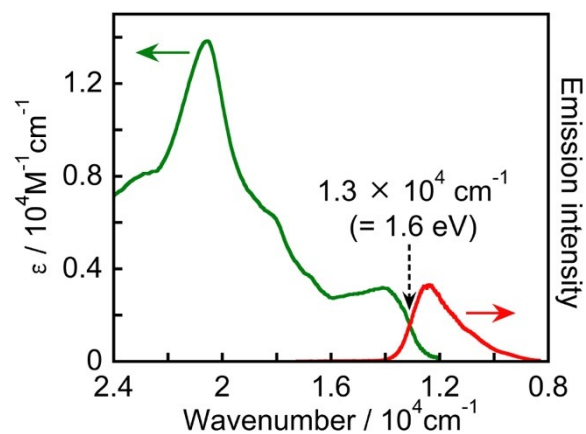

Figure S4. Normalized absorption (green line) and emission (red line) spectra of **Os** in DMA.

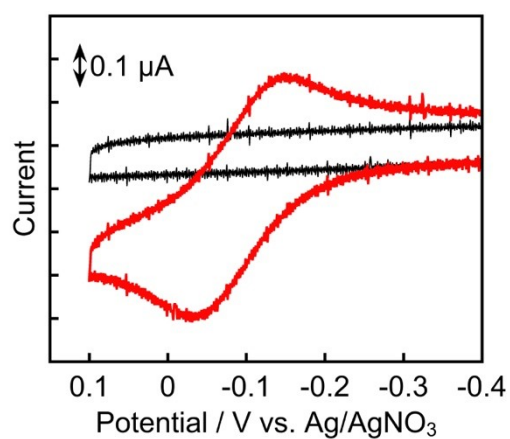

Figure S5. Cyclic voltammogram of BI(OH)H (5 mM) (red line) in an Ar-saturated DMA solution containing  $\text{Et}_4\text{NBF}_4$  (0.1 M) as a supporting electrolyte with a  $\text{Ag}/\text{AgNO}_3$  (10 mM) reference electrode and micro glassy-carbon working electrode ( $\phi = 33 \mu\text{m}$ ). Scan rate was  $200 \text{ V}\cdot\text{s}^{-1}$ . Black line shows the background current.

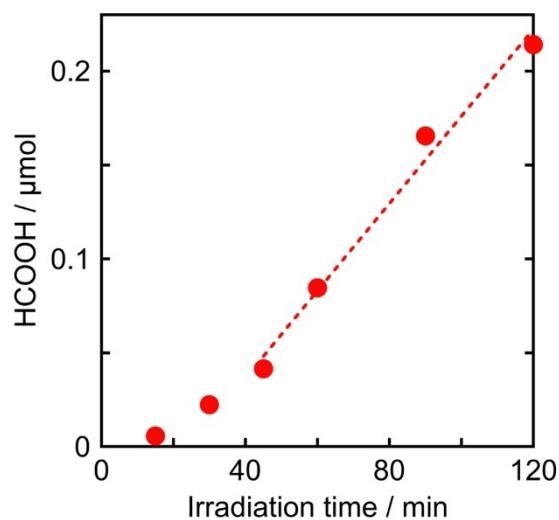

Figure S6. Photocatalytic formation of HCOOH: CO<sub>2</sub>-saturated DMA solutions (3.5 mL) containing **Os** (50 μM), **Ru(CO)** (50 μM) and BI(OH)H (0.2 M) were irradiated at 480-nm light. Light intensity was  $7.5 \times 10^{-8}$  einstein·s<sup>-1</sup>.

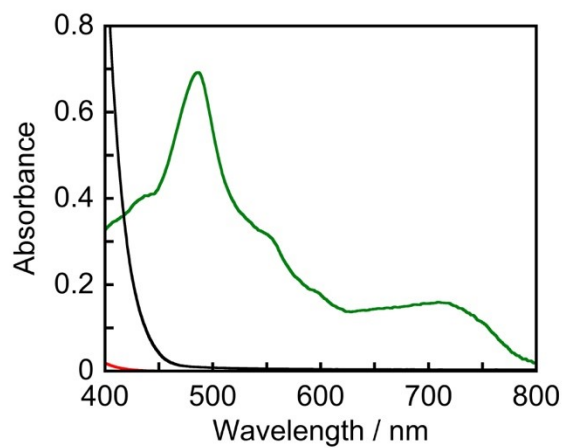

Figure S7. Visible absorption spectra of **Os** (50 μM, green line), **Ru(CO)** (50 μM, red line) and BI(OH)H (0.2 M, black line) in DMA. Light-pass length was 10 mm.
